# Supplementary material for: The Effect of Mitochondria on Ganoderma lucidum Growth and Bioactive Components Based on Transcriptomics
Source: MDPI journal article supplement (doi:10.3390/jof8111182), 2022-11-09

# The Effect of Mitochondria on *Ganoderma lucidum* Growth and Bioactive Components Based on Transcriptomics

Liyun Ye <sup>1</sup>, Xiaofang He <sup>1</sup>, Congbao Su <sup>1</sup>, Haiying Feng <sup>1</sup>, Guoliang Meng <sup>1</sup>, Bingzhi Chen <sup>2,3</sup> and Xiaoping Wu <sup>1,\*</sup>

<sup>1</sup> College of Life Sciences, Fujian Agriculture and Forestry University, Fuzhou 350002, China

<sup>2</sup> College of Food Sciences, Fujian Agriculture and Forestry University, Fuzhou 350002, China

<sup>3</sup> Key Laboratory of Subtropical Characteristic Fruits, Vegetables and Edible Fungi Processing (Co-Construction by Ministry and Province), Ministry of Agriculture and Rural Affairs, Fuzhou 350002, China

\* Correspondence: fjwxp@126.com

## Title page

**Figure 1. The process of constructing isonuclear alloplasmic.**

**Figure 2. The PCR results of isonuclear alloplasmic strain S1-S5.** (A) The PCR results of samples strain by the primers of nuclear genome. M indicates the 2,000 bp DNA marker; lane 1-5, 6-10, 11-15, 16-20, and 21-25 template DNA was S1-S5 in each group and primer were Nc-119, Nc-TL, Nc-WBL, Nc-SL4, and Nc-SL10, separately; lane 26 is negative control with ddH<sub>2</sub>O instead of DNA. (B) The PCR results of samples strain by the primers of mtDNA. M indicates the 2,000 bp DNA marker; lane 1-4 template DNA was S1 and primer were primer 6-9 in table s1; lane 5-8 template DNA was S2 and primer were primer 6-9 in table s1; lane 9-12 template DNA was S3 and primer were primer 6-9 in table s1; lane 13-16 template DNA was S4 and primer were primer 6-9 in table s1; lane 17-20 template DNA was S5 and primer were primer 6-9 in table s1; lane 21 is negative control with ddH<sub>2</sub>O instead of DNA.

**Figure 3. Biological characteristics of five isonuclear alloplasmic strains.** (A). colony and fruit bodies morphology. (B) mycelial growth rate in PDA. (C) mycelial growth rate in solid-state fermentation. The same letters mean not significantly different ( $p>0.05$ ).

**Figure 4. Correlation and DEGs analysis between strain S1 and S5.** (A) Pearson correlation analysis between samples of strain S1 and S5. (B) DEGs between strain S1 and S5.

**Figure 5 Enrichment analysis of DEGs.** (A) GO enrichment of DEGs. (B) Bubble plot of KEGG enrichment of DEGs.

**Figure 6. Polysaccharide and triterpenoid related pathways of isonuclear alloplasmic based on transcriptome analysis.** (A) pentose and glucuronate interconversions pathway. (B) starch and sucrose metabolism pathway. (C) steroid biosynthesis pathway; (D) Changes in expression of genes involved in pathways.

**Table 1.** Mushroom yield, basidiospores yield, and polysaccharide and triterpenoid

content in isonuclear alloplasmic strains S1-S5.

**Table S1.** Specific primers for nonconserved regions among nucleus DNA and mtDNA of *G.lucidum* strains.

Table S2. Summary of RNA-Seq data.

**Figure S1.** Pearson correlation analysis between samples among strain S1-S5.

**Supplementary tables and figures**

Table S1. Specific primers for nonconserved regions among nucleus DNA and mtDNA of *G.lucidum* strains.

| Primer number | Primer name   | Strain             | Location    | Primer sequence (5'→3')                                 | Production size (bp)        |
|---------------|---------------|--------------------|-------------|---------------------------------------------------------|-----------------------------|
| 1             | Nc-119        | M119-M71           | nucleus DNA | F:GACAACCAGTCACGCTCAAG;<br>R:CTATCCCATCCGTACTCCTG       | 418                         |
| 2             | Nc-TL         | MTL                | nucleus DNA | F:TTCACATCCCTCTCGTCTATGC;<br>R:TACTCCCCTCCTGATCTTTCCT   | 643                         |
| 3             | Nc-WBL        | MWBL               | nucleus DNA | F:CGCAACACACAGGAGAATCAAC;<br>R:CAACTCAGACTTTCC          | 594                         |
| 4             | Nc-SL10       | MSL10              | nucleus DNA | F:GTACATCCGTTCCGGCTTCG;<br>R:TGCTTTGGTGGGGTTCAAG        | 449                         |
| 5             | Nc-SL4        | MSL4               | nucleus DNA | F:ACCAAAACCATGAAATCCAACAG;<br>R:GGAGGGAGATAATCAAACGAAAA | 465                         |
| 6             | Mito-119-TL   | MTL; M119-M71      | mtDNA       | F:TAGCGGTCTTAAGTATGAGGA;<br>R:GGTATTCCATCTTTTCGTCAT     | MTL:261;<br>M119-M71:1933   |
| 7             | Mito-119-WBL  | MWBL;<br>M119-M71  | mtDNA       | F:AACCATATCTCACACACCATCT;<br>R:ATCAGCACTTTTTGTAAATTC    | MWBL:1117;<br>M119-M71:824  |
| 8             | Mito-119-SL10 | MSL10;<br>M119-M71 | mtDNA       | F:GATAGGTACTGCATTCTTGGG;<br>R:CAGGAACAATAGATGCTGGTG     | MSL10:1491;<br>M119-M71:401 |
| 9             | Mito-119-SL4  | MSL4;<br>M119-M71  | mtDNA       | F:TATCAGCACCTGGAGTGCAAGT;<br>R:CATCTCCTTCAATTAACCCTGC   | MSL4:253;<br>M119-M71:1528  |

Table S2. Summary of RNA-Seq data.

| Sample | Raw Reads | Raw Bases | Clean Reads | Clean Bases | Error Rate | Q20    | Q30    | GC Content |
|--------|-----------|-----------|-------------|-------------|------------|--------|--------|------------|
| S1_1   | 21559906  | 3.23G     | 21464430    | 3.22G       | 0.03%      | 97.60% | 93.68% | 59.67%     |
| S1_2   | 25145530  | 3.77G     | 25033436    | 3.76G       | 0.03%      | 97.54% | 93.54% | 59.56%     |
| S1_3   | 22296198  | 3.34G     | 22206522    | 3.33G       | 0.03%      | 97.56% | 93.60% | 59.70%     |
| S2_1   | 27409858  | 4.11G     | 27312980    | 4.1G        | 0.03%      | 97.72% | 93.95% | 59.62%     |
| S2_2   | 30734054  | 4.61G     | 30620530    | 4.59G       | 0.03%      | 97.55% | 93.63% | 59.52%     |
| S2_3   | 22500770  | 3.37G     | 22421140    | 3.36G       | 0.03%      | 97.72% | 93.90% | 59.41%     |
| S3_1   | 24568268  | 3.68G     | 24468368    | 3.67G       | 0.03%      | 97.72% | 93.91% | 59.53%     |
| S3_2   | 23816140  | 3.57G     | 23720756    | 3.56G       | 0.03%      | 97.65% | 93.84% | 59.55%     |
| S3_3   | 20727876  | 3.1G      | 20650116    | 3.1G        | 0.03%      | 97.80% | 94.09% | 59.50%     |
| S4_1   | 22344306  | 3.35G     | 22264820    | 3.34G       | 0.03%      | 97.79% | 94.00% | 59.66%     |
| S4_2   | 30760148  | 4.61G     | 30650670    | 4.6G        | 0.03%      | 97.79% | 94.08% | 59.63%     |
| S4_3   | 26272338  | 3.94G     | 26165408    | 3.92G       | 0.03%      | 97.51% | 93.63% | 59.60%     |
| S5_1   | 28972968  | 4.34G     | 28860520    | 4.33G       | 0.03%      | 97.53% | 93.64% | 59.70%     |
| S5_2   | 19012984  | 2.85G     | 18930552    | 2.84G       | 0.03%      | 97.61% | 93.68% | 59.50%     |
| S5_3   | 24246148  | 3.63G     | 24147638    | 3.62G       | 0.03%      | 97.55% | 93.67% | 59.61%     |

Figure S1. Pearson correlation analysis between samples among strain S1-S5.

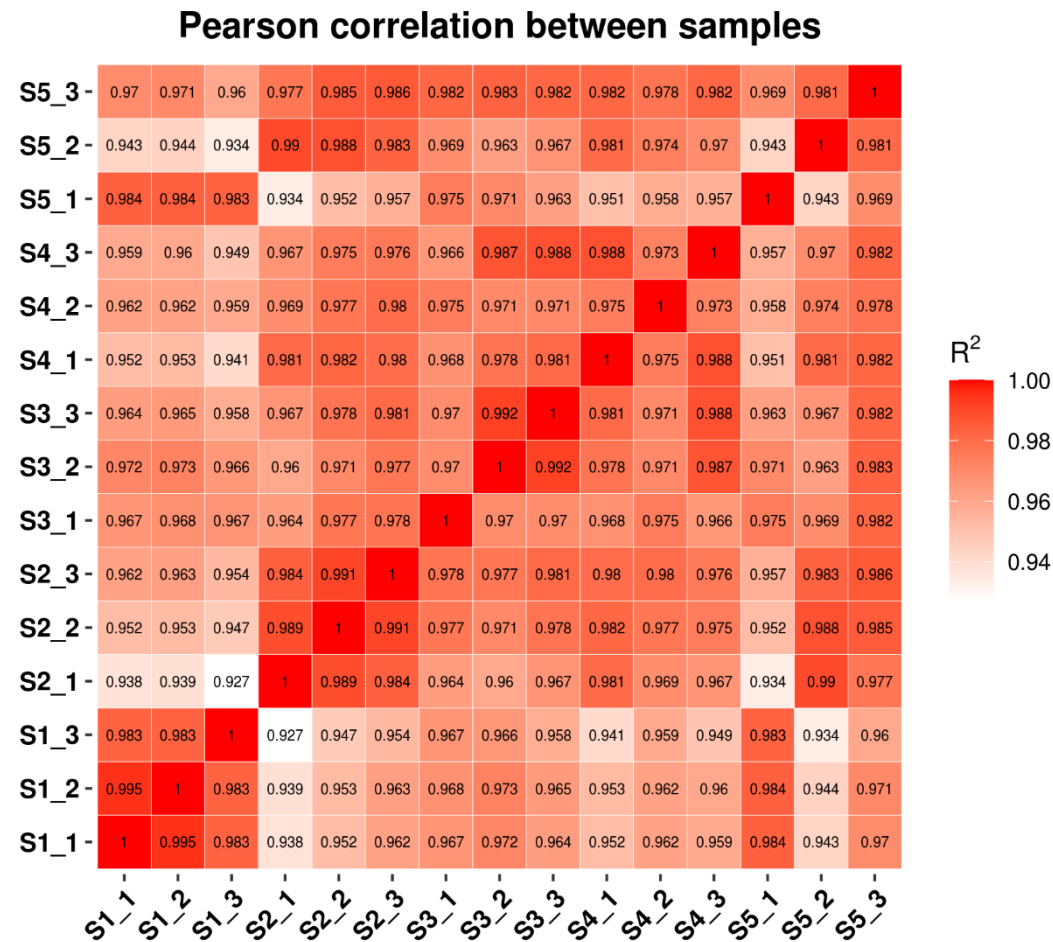

Supplement: s1 [file s1]
